# Supplementary material for: Influence of the heme distal pocket on nitrite binding orientation and reactivity in Sperm Whale myoglobin
Source: PubMed Central journal article supplement (PMC7925009; doi:10.1042/bcj20200596), 2021-02-26
Supplement: BCJ-478-927-s1.pdf [file BCJ-478-927-s1.pdf]

Supporting Information

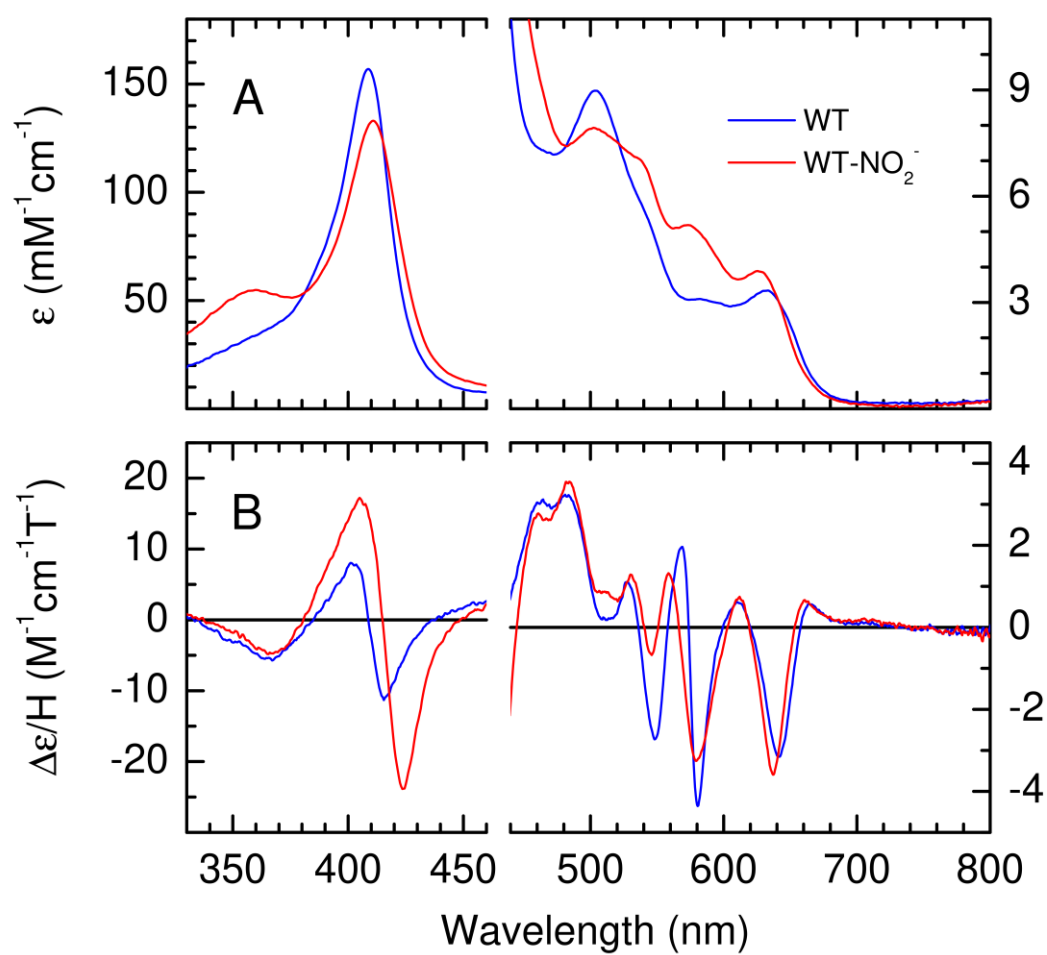

**Figure S1.** Spectroscopic changes induced by the addition of 100 mM nitrite to wild-type Sperm Whale myoglobin. **Panel A:** UV/vis electronic absorption spectrum **Panel B:** UV/vis RT-MCD spectrum before (790  $\mu\text{M}$  blue trace) and after (640  $\mu\text{M}$  red trace)

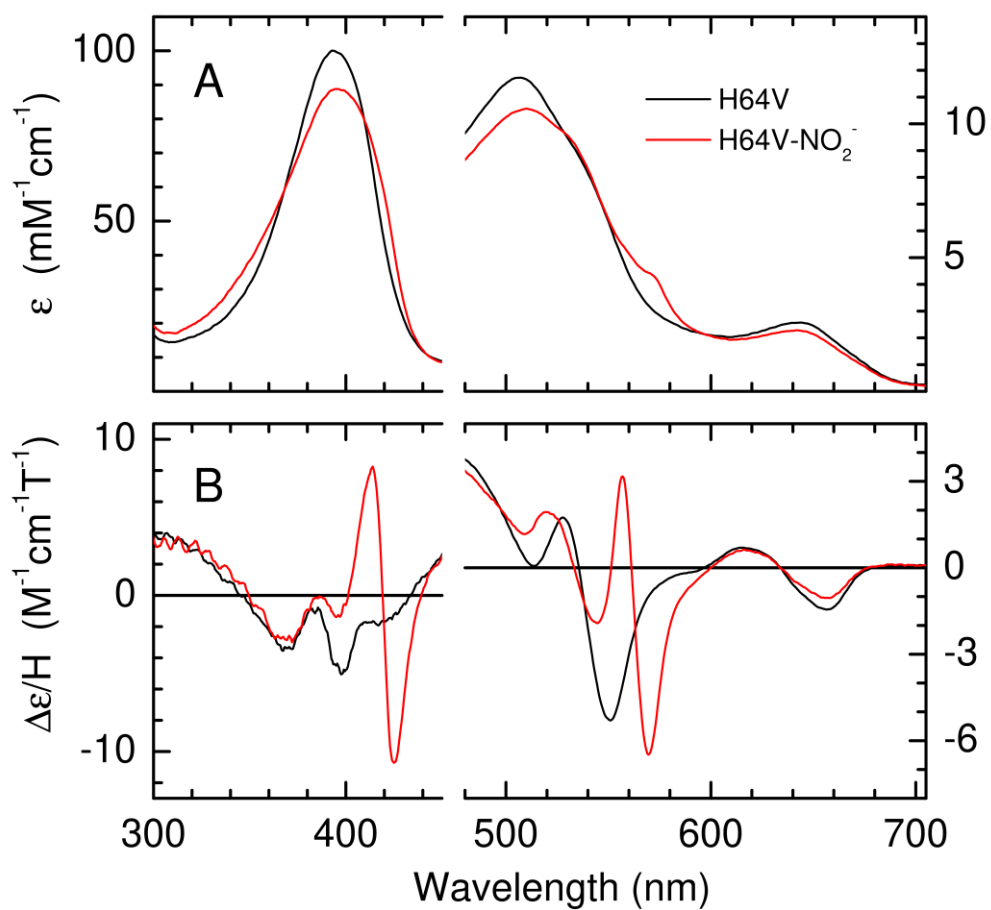

**Figure S2** Spectroscopic changes induced by the substitution of the distal histidine ligand (His-64) by valine in Fe (III) Sperm Whale myoglobin in the absence and presence of nitrite **Panel A:** UV/vis electronic absorption spectrum **Panel B:** UV/vis RT MCD spectrum

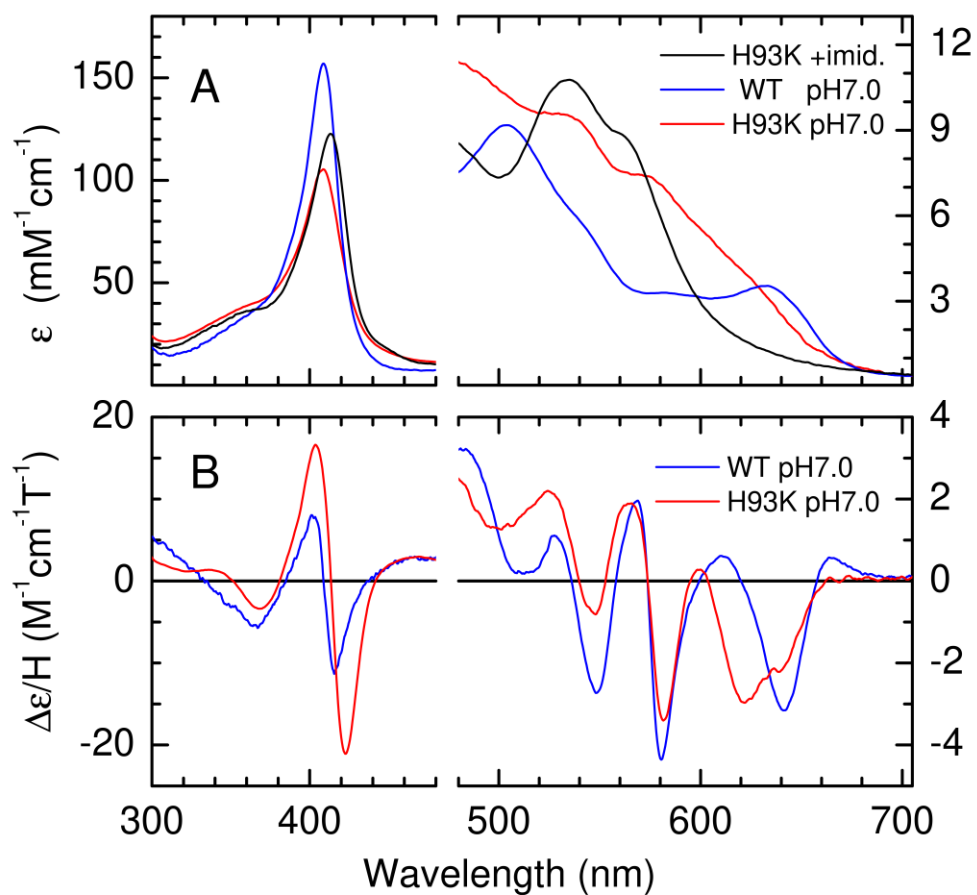

**Figure S3.** Spectroscopic changes induced by the substitution of the proximal histidine ligand (His-93) by lysine in Fe(III) Sperm Whale myoglobin in the absence and presence of imidazole. **Panel A:** UV/vis electronic absorption spectrum **Panel B:** UV/vis RT-MCD spectrum

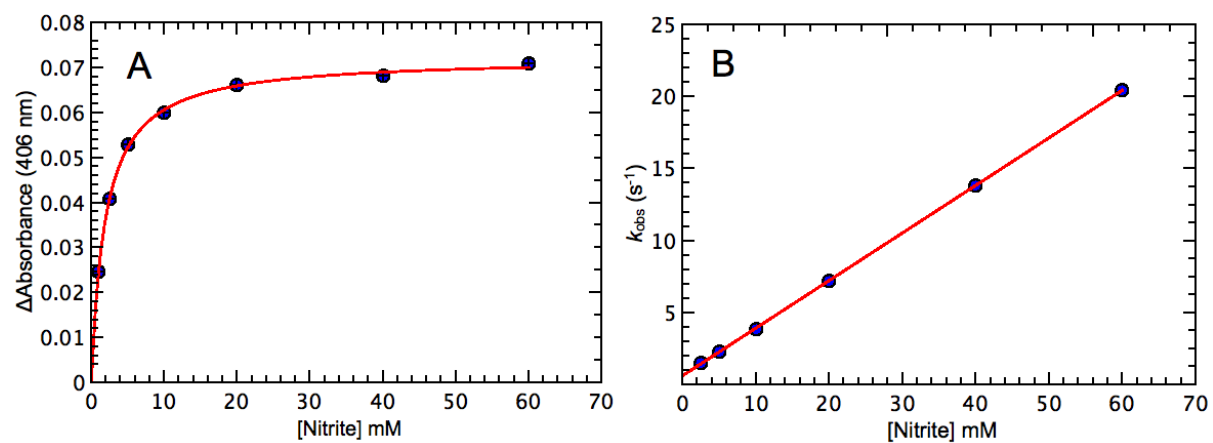

**Figure S4.** Concentration dependence of the reaction of the Fe (III) form of the H93K variant of Sperm Whale myoglobin with nitrite

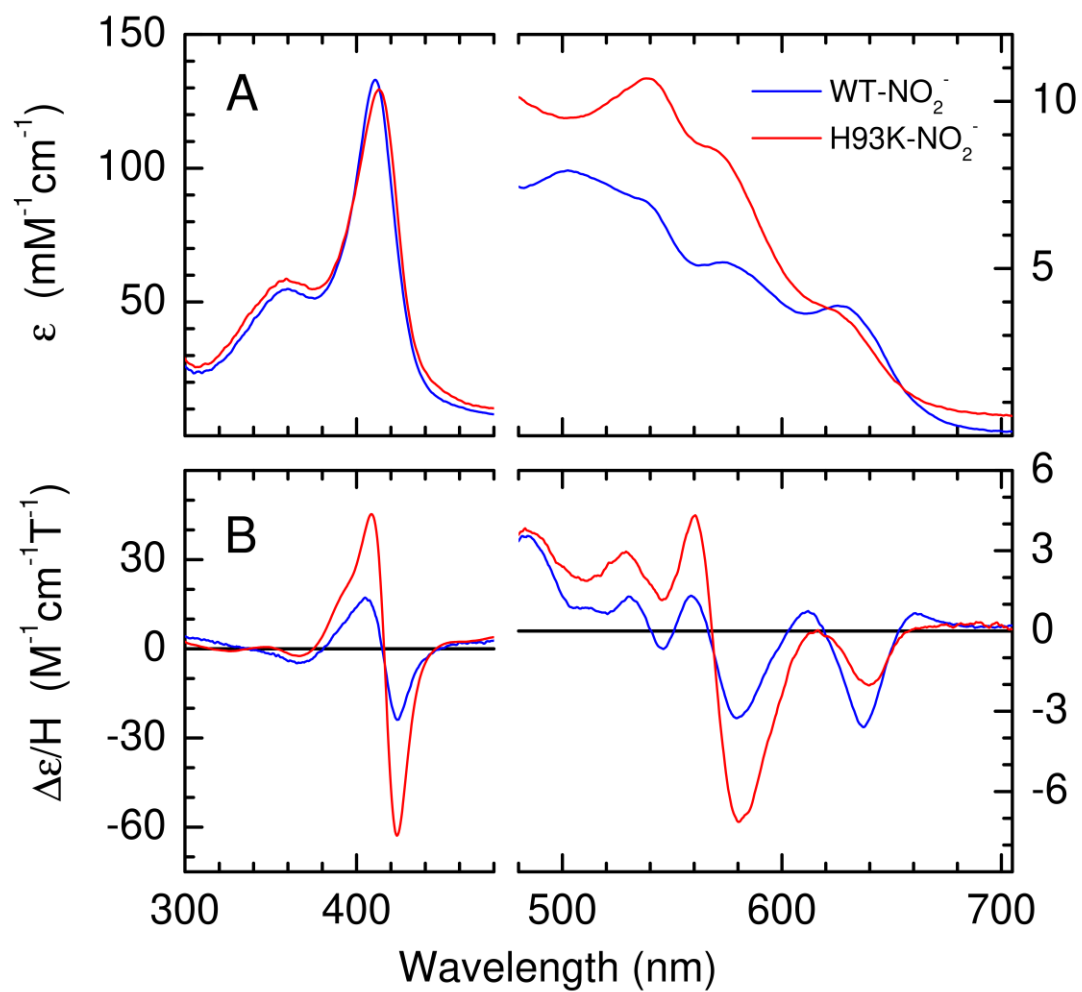

**Figure S5** Spectroscopic changes induced by the substitution of the proximal histidine ligand (His-93) by lysine in Fe (III) Sperm Whale myoglobin in the presence of nitrite Panel A UV/vis electronic absorption spectrum Panel B UV/vis RT MCD spectrum

| Oxidation/ligand State  | Wild-type Sperm Whale Myoglobin |                         | H93K Sperm Whale Myoglobin |                               |
|-------------------------|---------------------------------|-------------------------|----------------------------|-------------------------------|
|                         | Soret Maximum                   | Visible region          | Soret Maximum              | Visible region                |
| Fe (III)                | 409 nm                          | Max 503, 596 & 642 nm   | 408 nm                     | Max 498, 542, 575 & ca 625 nm |
| Fe (II)-NO <sup>+</sup> | 420 nm                          | Max. 574,535 nm<br>Min  | 420 nm                     | Max. 570,534 nm<br>Min        |
| Fe (II)                 | 434 nm                          | Max. 557 nm             | 429 nm                     | 565 nm                        |
| Fe (II)-NO              | 421 nm                          | Max. 581,549 nm<br>Min. | 419 nm                     | Max. 576,545 nm<br>Min        |

**Table S1** Summary of the key features of the UV/vis electronic absorption spectra of wild-type and H93K Sperm Whale myoglobin in the absence and presence of bound NO.
